# Supplementary material for: RNA-Seq transcriptomic analysis reveals gene expression profiles of acetic acid bacteria under high-acidity submerged industrial fermentation process
Source: Front Microbiol. 2022 Sep 29;13:956729. doi: 10.3389/fmicb.2022.956729 (PMC9557201; doi:10.3389/fmicb.2022.956729)
Supplement: Supplementary file 1 [file Table_1.XLSX]

## Sheet: Mid_up-regulated
Table S1: KEGG enrichment analysis of DEGs within the treatment samples. Terms that are significantly enriched were marked with red.
Terms	Candidate genes with pathway annotation (44)	All genes with pathway annotation (967)	Pvalue	P-corrected	Pathway ID
Metabolic pathways	40 (90.91%)	616 (63.7%)	3e-05	0.00134	ko01100
Oxidative phosphorylation	11 (25%)	63 (6.51%)	5.3e-05	0.00134	ko00190
Citrate cycle (TCA cycle)	6 (13.64%)	22 (2.28%)	0.000271	0.00461	ko00020
Riboflavin metabolism	4 (9.09%)	9 (0.93%)	0.000399	0.005088	ko00740
Tryptophan metabolism	4 (9.09%)	10 (1.03%)	0.000643	0.006559	ko00380
Glyoxylate and dicarboxylate metabolism	5 (11.36%)	20 (2.07%)	0.001443	0.012263	ko00630
Microbial metabolism in diverse environments	16 (36.36%)	169 (17.48%)	0.001705	0.012426	ko01120
Aminobenzoate degradation	2 (4.55%)	3 (0.31%)	0.0059	0.037612	ko00627
Biosynthesis of secondary metabolites	20 (45.45%)	268 (27.71%)	0.007573	0.042915	ko01110
Lysine degradation	3 (6.82%)	11 (1.14%)	0.011237	0.050968	ko00310
Naphthalene degradation	2 (4.55%)	4 (0.41%)	0.011459	0.050968	ko00626
Carbon metabolism	9 (20.45%)	86 (8.89%)	0.011992	0.050968	ko01200
Fatty acid degradation	2 (4.55%)	6 (0.62%)	0.02702	0.098431	ko00071
Degradation of aromatic compounds	2 (4.55%)	6 (0.62%)	0.02702	0.098431	ko01220
Tyrosine metabolism	3 (6.82%)	16 (1.65%)	0.032511	0.110538	ko00350
Chloroalkane and chloroalkene degradation	2 (4.55%)	7 (0.72%)	0.036744	0.117122	ko00625
Styrene degradation	1 (2.27%)	1 (0.1%)	0.045502	0.136505	ko00643
Porphyrin and chlorophyll metabolism	4 (9.09%)	37 (3.83%)	0.082285	0.23314	ko00860
Glutathione metabolism	3 (6.82%)	25 (2.59%)	0.100532	0.256358	ko00480
2-Oxocarboxylic acid metabolism	3 (6.82%)	25 (2.59%)	0.100532	0.256358	ko01210
Taurine and hypotaurine metabolism	1 (2.27%)	4 (0.41%)	0.170203	0.404424	ko00430
Glycolysis / Gluconeogenesis	3 (6.82%)	32 (3.31%)	0.174458	0.404424	ko00010
Propanoate metabolism	2 (4.55%)	18 (1.86%)	0.195647	0.420588	ko00640
Pentose phosphate pathway	3 (6.82%)	34 (3.52%)	0.197924	0.420588	ko00030
Prodigiosin biosyntheses	1 (2.27%)	5 (0.52%)	0.208116	0.424557	ko00333
Pyruvate metabolism	3 (6.82%)	37 (3.83%)	0.234479	0.45994	ko00620
Vitamin B6 metabolism	1 (2.27%)	6 (0.62%)	0.244336	0.461523	ko00750
Cyanoamino acid metabolism	1 (2.27%)	7 (0.72%)	0.278934	0.495373	ko00460
Carbon fixation pathways in prokaryotes	2 (4.55%)	23 (2.38%)	0.281683	0.495373	ko00720
Valine, leucine and isoleucine degradation	1 (2.27%)	8 (0.83%)	0.311983	0.530371	ko00280
Nitrogen metabolism	1 (2.27%)	9 (0.93%)	0.34355	0.541665	ko00910
Biofilm formation - Escherichia coli	1 (2.27%)	9 (0.93%)	0.34355	0.541665	ko02026
Glycine, serine and threonine metabolism	2 (4.55%)	27 (2.79%)	0.350489	0.541665	ko00260
Biotin metabolism	1 (2.27%)	13 (1.34%)	0.456258	0.664833	ko00780
Drug metabolism - other enzymes	1 (2.27%)	13 (1.34%)	0.456258	0.664833	ko00983
DNA replication	1 (2.27%)	14 (1.45%)	0.481336	0.667832	ko03030
Fatty acid biosynthesis	1 (2.27%)	16 (1.65%)	0.528148	0.667832	ko00061
Butanoate metabolism	1 (2.27%)	16 (1.65%)	0.528148	0.667832	ko00650
Carbon fixation in photosynthetic organisms	1 (2.27%)	16 (1.65%)	0.528148	0.667832	ko00710
Glycerophospholipid metabolism	1 (2.27%)	17 (1.76%)	0.549979	0.667832	ko00564
Fatty acid metabolism	1 (2.27%)	17 (1.76%)	0.549979	0.667832	ko01212
Mismatch repair	1 (2.27%)	17 (1.76%)	0.549979	0.667832	ko03430
Starch and sucrose metabolism	1 (2.27%)	18 (1.86%)	0.570822	0.67599	ko00500
Nicotinate and nicotinamide metabolism	1 (2.27%)	19 (1.96%)	0.590721	0.67599	ko00760
Folate biosynthesis	1 (2.27%)	20 (2.07%)	0.609717	0.67599	ko00790
Homologous recombination	1 (2.27%)	20 (2.07%)	0.609717	0.67599	ko03440
Alanine, aspartate and glutamate metabolism	1 (2.27%)	22 (2.28%)	0.64516	0.685482	ko00250
Methane metabolism	1 (2.27%)	22 (2.28%)	0.64516	0.685482	ko00680
Pyrimidine metabolism	1 (2.27%)	30 (3.1%)	0.758039	0.78898	ko00240
Biosynthesis of amino acids	3 (6.82%)	101 (10.44%)	0.857977	0.875136	ko01230
Quorum sensing	1 (2.27%)	54 (5.58%)	0.924835	0.924835	ko02024

## Sheet: Mid_down-regulated
Table S1: KEGG enrichment analysis of DEGs within the treatment samples. Terms that are significantly enriched were marked with red.
Terms	Candidate genes with pathway annotation (116)	All genes with pathway annotation (967)	Pvalue	P-corrected	Pathway ID
Ribosome	48 (41.38%)	53 (5.48%)	0	0	ko03010
Valine, leucine and isoleucine biosynthesis	7 (6.03%)	12 (1.24%)	0.000143	0.003782	ko00290
C5-Branched dibasic acid metabolism	5 (4.31%)	9 (0.93%)	0.001937	0.034217	ko00660
2-Oxocarboxylic acid metabolism	7 (6.03%)	25 (2.59%)	0.022609	0.268492	ko01210
Porphyrin and chlorophyll metabolism	9 (7.76%)	37 (3.83%)	0.025329	0.268492	ko00860
One carbon pool by folate	4 (3.45%)	12 (1.24%)	0.045288	0.400044	ko00670
Pantothenate and CoA biosynthesis	5 (4.31%)	18 (1.86%)	0.054037	0.409134	ko00770
RNA degradation	4 (3.45%)	18 (1.86%)	0.159875	0.996561	ko03018
Biotin metabolism	3 (2.59%)	13 (1.34%)	0.197335	0.996561	ko00780
Glyoxylate and dicarboxylate metabolism	4 (3.45%)	20 (2.07%)	0.210835	0.996561	ko00630
Sesquiterpenoid and triterpenoid biosynthesis	1 (0.86%)	2 (0.21%)	0.225636	0.996561	ko00909
Biosynthesis of various secondary metabolites - part 2	1 (0.86%)	2 (0.21%)	0.225636	0.996561	ko00998
Protein export	3 (2.59%)	15 (1.55%)	0.264544	1	ko03060
Terpenoid backbone biosynthesis	2 (1.72%)	10 (1.03%)	0.341723	1	ko00900
Bacterial secretion system	3 (2.59%)	19 (1.96%)	0.403459	1	ko03070
Glycine, serine and threonine metabolism	4 (3.45%)	27 (2.79%)	0.409733	1	ko00260
Plant-pathogen interaction	1 (0.86%)	5 (0.52%)	0.47289	1	ko04626
Monobactam biosynthesis	1 (0.86%)	6 (0.62%)	0.53645	1	ko00261
Fatty acid biosynthesis	2 (1.72%)	16 (1.65%)	0.59028	1	ko00061
Butanoate metabolism	2 (1.72%)	16 (1.65%)	0.59028	1	ko00650
Inositol phosphate metabolism	1 (0.86%)	7 (0.72%)	0.592404	1	ko00562
Purine metabolism	6 (5.17%)	52 (5.38%)	0.609066	1	ko00230
Fatty acid metabolism	2 (1.72%)	17 (1.76%)	0.624439	1	ko01212
Mismatch repair	2 (1.72%)	17 (1.76%)	0.624439	1	ko03430
beta-Alanine metabolism	1 (0.86%)	8 (0.83%)	0.641655	1	ko00410
Selenocompound metabolism	1 (0.86%)	8 (0.83%)	0.641655	1	ko00450
ABC transporters	6 (5.17%)	54 (5.58%)	0.647677	1	ko02010
Nitrogen metabolism	1 (0.86%)	9 (0.93%)	0.685	1	ko00910
Biofilm formation - Escherichia coli	1 (0.86%)	9 (0.93%)	0.685	1	ko02026
Folate biosynthesis	2 (1.72%)	20 (2.07%)	0.713765	1	ko00790
Sulfur metabolism	2 (1.72%)	20 (2.07%)	0.713765	1	ko00920
Carbon metabolism	9 (7.76%)	86 (8.89%)	0.728633	1	ko01200
Streptomycin biosynthesis	1 (0.86%)	11 (1.14%)	0.756701	1	ko00521
Carbon fixation pathways in prokaryotes	2 (1.72%)	23 (2.38%)	0.784741	1	ko00720
Sulfur relay system	1 (0.86%)	12 (1.24%)	0.786223	1	ko04122
Pentose phosphate pathway	3 (2.59%)	34 (3.52%)	0.796699	1	ko00030
Biosynthesis of amino acids	10 (8.62%)	101 (10.44%)	0.798803	1	ko01230
Thiamine metabolism	1 (0.86%)	13 (1.34%)	0.812189	1	ko00730
Drug metabolism - other enzymes	1 (0.86%)	13 (1.34%)	0.812189	1	ko00983
Amino sugar and nucleotide sugar metabolism	2 (1.72%)	25 (2.59%)	0.8231	1	ko00520
Arginine and proline metabolism	1 (0.86%)	16 (1.65%)	0.872762	1	ko00330
Propanoate metabolism	1 (0.86%)	18 (1.86%)	0.901923	1	ko00640
Cysteine and methionine metabolism	2 (1.72%)	32 (3.31%)	0.913804	1	ko00270
Homologous recombination	1 (0.86%)	20 (2.07%)	0.924446	1	ko03440
Alanine, aspartate and glutamate metabolism	1 (0.86%)	22 (2.28%)	0.94183	1	ko00250
Methane metabolism	1 (0.86%)	22 (2.28%)	0.94183	1	ko00680
Biosynthesis of secondary metabolites	25 (21.55%)	268 (27.71%)	0.957168	1	ko01110
Glutathione metabolism	1 (0.86%)	25 (2.59%)	0.960747	1	ko00480
Aminoacyl-tRNA biosynthesis	1 (0.86%)	26 (2.69%)	0.965581	1	ko00970
Pyruvate metabolism	1 (0.86%)	37 (3.83%)	0.99197	1	ko00620
Quorum sensing	2 (1.72%)	54 (5.58%)	0.992774	1	ko02024
Microbial metabolism in diverse environments	8 (6.9%)	169 (17.48%)	0.999871	1	ko01120
Metabolic pathways	48 (41.38%)	616 (63.7%)	1	1	ko01100

## Sheet: Final_up-regulated
Table S1: KEGG enrichment analysis of DEGs within the treatment samples. Terms that are significantly enriched were marked with red.
Terms	Candidate genes with pathway annotation (87)	All genes with pathway annotation (967)	Pvalue	P-corrected	Pathway ID
Citrate cycle (TCA cycle)	15 (17.24%)	22 (2.28%)	0	0	ko00020
Metabolic pathways	80 (91.95%)	616 (63.7%)	0	0	ko01100
Microbial metabolism in diverse environments	39 (44.83%)	169 (17.48%)	0	0	ko01120
Carbon metabolism	25 (28.74%)	86 (8.89%)	0	0	ko01200
Oxidative phosphorylation	19 (21.84%)	63 (6.51%)	0	6e-06	ko00190
Carbon fixation pathways in prokaryotes	10 (11.49%)	23 (2.38%)	9e-06	9.8e-05	ko00720
Biosynthesis of secondary metabolites	39 (44.83%)	268 (27.71%)	0.000252	0.002335	ko01110
Butanoate metabolism	6 (6.9%)	16 (1.65%)	0.001713	0.013603	ko00650
Pentose phosphate pathway	9 (10.34%)	34 (3.52%)	0.002043	0.013603	ko00030
Methane metabolism	7 (8.05%)	22 (2.28%)	0.002093	0.013603	ko00680
Glycolysis / Gluconeogenesis	8 (9.2%)	32 (3.31%)	0.005401	0.029404	ko00010
Riboflavin metabolism	4 (4.6%)	9 (0.93%)	0.005428	0.029404	ko00740
Glyoxylate and dicarboxylate metabolism	6 (6.9%)	20 (2.07%)	0.006164	0.030819	ko00630
Tryptophan metabolism	4 (4.6%)	10 (1.03%)	0.008431	0.039144	ko00380
Pyruvate metabolism	8 (9.2%)	37 (3.83%)	0.013595	0.058911	ko00620
Starch and sucrose metabolism	5 (5.75%)	18 (1.86%)	0.017573	0.07139	ko00500
beta-Alanine metabolism	3 (3.45%)	8 (0.83%)	0.028257	0.108042	ko00410
Nitrogen metabolism	3 (3.45%)	9 (0.93%)	0.039671	0.138444	ko00910
Taurine and hypotaurine metabolism	2 (2.3%)	4 (0.41%)	0.042598	0.138444	ko00430
Naphthalene degradation	2 (2.3%)	4 (0.41%)	0.042598	0.138444	ko00626
Tyrosine metabolism	4 (4.6%)	16 (1.65%)	0.048043	0.148705	ko00350
Glutathione metabolism	5 (5.75%)	25 (2.59%)	0.065984	0.190552	ko00480
Lysine degradation	3 (3.45%)	11 (1.14%)	0.068327	0.190552	ko00310
Propanoate metabolism	4 (4.6%)	18 (1.86%)	0.070358	0.190552	ko00640
Styrene degradation	1 (1.15%)	1 (0.1%)	0.089969	0.219528	ko00643
Pentose and glucuronate interconversions	2 (2.3%)	6 (0.62%)	0.094566	0.219528	ko00040
Fatty acid degradation	2 (2.3%)	6 (0.62%)	0.094566	0.219528	ko00071
Degradation of aromatic compounds	2 (2.3%)	6 (0.62%)	0.094566	0.219528	ko01220
Chloroalkane and chloroalkene degradation	2 (2.3%)	7 (0.72%)	0.124842	0.279819	ko00625
Carbon fixation in photosynthetic organisms	3 (3.45%)	16 (1.65%)	0.167878	0.360495	ko00710
Lipoic acid metabolism	1 (1.15%)	2 (0.21%)	0.171928	0.360495	ko00785
2-Oxocarboxylic acid metabolism	4 (4.6%)	25 (2.59%)	0.180724	0.367096	ko01210
Fructose and mannose metabolism	3 (3.45%)	18 (1.86%)	0.215474	0.407375	ko00051
Pantothenate and CoA biosynthesis	3 (3.45%)	18 (1.86%)	0.215474	0.407375	ko00770
Glycine, serine and threonine metabolism	4 (4.6%)	27 (2.79%)	0.219356	0.407375	ko00260
Aminobenzoate degradation	1 (1.15%)	3 (0.31%)	0.246584	0.44522	ko00627
Pyrimidine metabolism	4 (4.6%)	30 (3.1%)	0.280878	0.493434	ko00240
Drug metabolism - other enzymes	2 (2.3%)	13 (1.34%)	0.329299	0.563275	ko00983
Prodigiosin biosyntheses	1 (1.15%)	5 (0.52%)	0.376501	0.611815	ko00333
Plant-pathogen interaction	1 (1.15%)	5 (0.52%)	0.376501	0.611815	ko04626
Monobactam biosynthesis	1 (1.15%)	6 (0.62%)	0.432888	0.669946	ko00261
Vitamin B6 metabolism	1 (1.15%)	6 (0.62%)	0.432888	0.669946	ko00750
Mismatch repair	2 (2.3%)	17 (1.76%)	0.461603	0.697773	ko03430
Cyanoamino acid metabolism	1 (1.15%)	7 (0.72%)	0.484229	0.7112	ko00460
RNA degradation	2 (2.3%)	18 (1.86%)	0.49237	0.7112	ko03018
Histidine metabolism	2 (2.3%)	19 (1.96%)	0.522028	0.719023	ko00340
Valine, leucine and isoleucine degradation	1 (1.15%)	8 (0.83%)	0.530971	0.719023	ko00280
Glycerolipid metabolism	1 (1.15%)	8 (0.83%)	0.530971	0.719023	ko00561
Biofilm formation - Escherichia coli	1 (1.15%)	9 (0.93%)	0.573521	0.745578	ko02026
Nucleotide excision repair	1 (1.15%)	9 (0.93%)	0.573521	0.745578	ko03420
Porphyrin and chlorophyll metabolism	3 (3.45%)	37 (3.83%)	0.663781	0.845995	ko00860
Lysine biosynthesis	1 (1.15%)	13 (1.34%)	0.70877	0.855473	ko00300
Biotin metabolism	1 (1.15%)	13 (1.34%)	0.70877	0.855473	ko00780
Biosynthesis of amino acids	8 (9.2%)	101 (10.44%)	0.710701	0.855473	ko01230
DNA replication	1 (1.15%)	14 (1.45%)	0.735329	0.869025	ko03030
Fatty acid biosynthesis	1 (1.15%)	16 (1.65%)	0.78147	0.90703	ko00061
Fatty acid metabolism	1 (1.15%)	17 (1.76%)	0.801462	0.90703	ko01212
Nicotinate and nicotinamide metabolism	1 (1.15%)	19 (1.96%)	0.836178	0.90703	ko00760
Bacterial secretion system	1 (1.15%)	19 (1.96%)	0.836178	0.90703	ko03070
Folate biosynthesis	1 (1.15%)	20 (2.07%)	0.851212	0.90703	ko00790
Homologous recombination	1 (1.15%)	20 (2.07%)	0.851212	0.90703	ko03440
Alanine, aspartate and glutamate metabolism	1 (1.15%)	22 (2.28%)	0.877308	0.919758	ko00250
Two-component system	2 (2.3%)	48 (4.96%)	0.9422	0.964702	ko02020
Purine metabolism	2 (2.3%)	52 (5.38%)	0.958332	0.964702	ko00230
Quorum sensing	2 (2.3%)	54 (5.58%)	0.964702	0.964702	ko02024

## Sheet: Final_down-regulated
Table S1: KEGG enrichment analysis of DEGs within the treatment samples. Terms that are significantly enriched were marked with red.
Terms	Candidate genes with pathway annotation (212)	All genes with pathway annotation (967)	Pvalue	P-corrected	Pathway ID
Ribosome	52 (24.53%)	53 (5.48%)	0	0	ko03010
C5-Branched dibasic acid metabolism	7 (3.3%)	9 (0.93%)	0.000536	0.021177	ko00660
Photosynthesis	6 (2.83%)	8 (0.83%)	0.001961	0.05163	ko00195
Valine, leucine and isoleucine biosynthesis	7 (3.3%)	12 (1.24%)	0.00638	0.100807	ko00290
One carbon pool by folate	7 (3.3%)	12 (1.24%)	0.00638	0.100807	ko00670
Protein export	7 (3.3%)	15 (1.55%)	0.02824	0.371824	ko03060
Fatty acid biosynthesis	7 (3.3%)	16 (1.65%)	0.041075	0.438153	ko00061
Biotin metabolism	6 (2.83%)	13 (1.34%)	0.04437	0.438153	ko00780
Fatty acid metabolism	7 (3.3%)	17 (1.76%)	0.057183	0.501943	ko01212
2-Oxocarboxylic acid metabolism	9 (4.25%)	25 (2.59%)	0.07473	0.590369	ko01210
Purine metabolism	15 (7.08%)	52 (5.38%)	0.143243	0.999924	ko00230
Bacterial secretion system	6 (2.83%)	19 (1.96%)	0.220693	0.999924	ko03070
Carbon fixation pathways in prokaryotes	7 (3.3%)	23 (2.38%)	0.222441	0.999924	ko00720
Selenocompound metabolism	3 (1.42%)	8 (0.83%)	0.246281	0.999924	ko00450
Sulfur metabolism	6 (2.83%)	20 (2.07%)	0.26129	0.999924	ko00920
Porphyrin and chlorophyll metabolism	10 (4.72%)	37 (3.83%)	0.278945	0.999924	ko00860
Ubiquinone and other terpenoid-quinone biosynthesis	2 (0.94%)	5 (0.52%)	0.302386	0.999924	ko00130
Prodigiosin biosyntheses	2 (0.94%)	5 (0.52%)	0.302386	0.999924	ko00333
Lipopolysaccharide biosynthesis	4 (1.89%)	13 (1.34%)	0.312969	0.999924	ko00540
Alanine, aspartate and glutamate metabolism	6 (2.83%)	22 (2.28%)	0.347132	0.999924	ko00250
Propanoate metabolism	5 (2.36%)	18 (1.86%)	0.357691	0.999924	ko00640
Pantothenate and CoA biosynthesis	5 (2.36%)	18 (1.86%)	0.357691	0.999924	ko00770
RNA degradation	5 (2.36%)	18 (1.86%)	0.357691	0.999924	ko03018
Glycine, serine and threonine metabolism	7 (3.3%)	27 (2.79%)	0.377423	0.999924	ko00260
Sesquiterpenoid and triterpenoid biosynthesis	1 (0.47%)	2 (0.21%)	0.390583	0.999924	ko00909
Biosynthesis of various secondary metabolites - part 2	1 (0.47%)	2 (0.21%)	0.390583	0.999924	ko00998
Monobactam biosynthesis	2 (0.94%)	6 (0.62%)	0.391945	0.999924	ko00261
Glyoxylate and dicarboxylate metabolism	5 (2.36%)	20 (2.07%)	0.455061	0.999924	ko00630
Biosynthesis of amino acids	23 (10.85%)	101 (10.44%)	0.456407	0.999924	ko01230
Phenylalanine, tyrosine and tryptophan biosynthesis	5 (2.36%)	21 (2.17%)	0.502378	0.999924	ko00400
Sulfur relay system	3 (1.42%)	12 (1.24%)	0.509475	0.999924	ko04122
Aminoacyl-tRNA biosynthesis	6 (2.83%)	26 (2.69%)	0.520888	0.999924	ko00970
ABC transporters	12 (5.66%)	54 (5.58%)	0.53436	0.999924	ko02010
Glycerolipid metabolism	2 (0.94%)	8 (0.83%)	0.552481	0.999924	ko00561
Thiamine metabolism	3 (1.42%)	13 (1.34%)	0.568426	0.999924	ko00730
Drug metabolism - other enzymes	3 (1.42%)	13 (1.34%)	0.568426	0.999924	ko00983
Nitrogen metabolism	2 (0.94%)	9 (0.93%)	0.620809	0.999924	ko00910
Arginine biosynthesis	3 (1.42%)	14 (1.45%)	0.622833	0.999924	ko00220
D-Glutamine and D-glutamate metabolism	1 (0.47%)	4 (0.41%)	0.629043	0.999924	ko00471
RNA polymerase	1 (0.47%)	4 (0.41%)	0.629043	0.999924	ko03020
Folate biosynthesis	4 (1.89%)	20 (2.07%)	0.670491	0.999924	ko00790
Amino sugar and nucleotide sugar metabolism	5 (2.36%)	25 (2.59%)	0.67139	0.999924	ko00520
Terpenoid backbone biosynthesis	2 (0.94%)	10 (1.03%)	0.680828	0.999924	ko00900
Plant-pathogen interaction	1 (0.47%)	5 (0.52%)	0.710708	0.999924	ko04626
Biosynthesis of secondary metabolites	56 (26.42%)	268 (27.71%)	0.71231	0.999924	ko01110
Arginine and proline metabolism	3 (1.42%)	16 (1.65%)	0.717013	0.999924	ko00330
Galactose metabolism	1 (0.47%)	6 (0.62%)	0.77446	0.999924	ko00052
Novobiocin biosynthesis	1 (0.47%)	6 (0.62%)	0.77446	0.999924	ko00401
Carbon metabolism	16 (7.55%)	86 (8.89%)	0.819289	0.999924	ko01200
Cyanoamino acid metabolism	1 (0.47%)	7 (0.72%)	0.824215	0.999924	ko00460
Inositol phosphate metabolism	1 (0.47%)	7 (0.72%)	0.824215	0.999924	ko00562
beta-Alanine metabolism	1 (0.47%)	8 (0.83%)	0.863034	0.999924	ko00410
Cysteine and methionine metabolism	5 (2.36%)	32 (3.31%)	0.865192	0.999924	ko00270
Peptidoglycan biosynthesis	2 (0.94%)	15 (1.55%)	0.874688	0.999924	ko00550
Cell cycle - Caulobacter	2 (0.94%)	15 (1.55%)	0.874688	0.999924	ko04112
Biofilm formation - Escherichia coli	1 (0.47%)	9 (0.93%)	0.893312	0.999924	ko02026
Butanoate metabolism	2 (0.94%)	16 (1.65%)	0.897213	0.999924	ko00650
Glycerophospholipid metabolism	2 (0.94%)	17 (1.76%)	0.915935	0.999924	ko00564
Mismatch repair	2 (0.94%)	17 (1.76%)	0.915935	0.999924	ko03430
Tryptophan metabolism	1 (0.47%)	10 (1.03%)	0.916922	0.999924	ko00380
Pyrimidine metabolism	4 (1.89%)	30 (3.1%)	0.923536	0.999924	ko00240
Streptomycin biosynthesis	1 (0.47%)	11 (1.14%)	0.935326	0.999924	ko00521
Base excision repair	1 (0.47%)	11 (1.14%)	0.935326	0.999924	ko03410
Pyruvate metabolism	5 (2.36%)	37 (3.83%)	0.935492	0.999924	ko00620
Glutathione metabolism	3 (1.42%)	25 (2.59%)	0.937301	0.999924	ko00480
Phenylalanine metabolism	1 (0.47%)	12 (1.24%)	0.949668	0.999924	ko00360
Lysine biosynthesis	1 (0.47%)	13 (1.34%)	0.960841	0.999924	ko00300
DNA replication	1 (0.47%)	14 (1.45%)	0.969543	0.999924	ko03030
Citrate cycle (TCA cycle)	2 (0.94%)	22 (2.28%)	0.970328	0.999924	ko00020
Methane metabolism	2 (0.94%)	22 (2.28%)	0.970328	0.999924	ko00680
Tyrosine metabolism	1 (0.47%)	16 (1.65%)	0.981592	0.999924	ko00350
Carbon fixation in photosynthetic organisms	1 (0.47%)	16 (1.65%)	0.981592	0.999924	ko00710
Pentose phosphate pathway	3 (1.42%)	34 (3.52%)	0.988926	0.999924	ko00030
Quorum sensing	6 (2.83%)	54 (5.58%)	0.988986	0.999924	ko02024
Oxidative phosphorylation	7 (3.3%)	63 (6.51%)	0.993025	0.999924	ko00190
Homologous recombination	1 (0.47%)	20 (2.07%)	0.9933	0.999924	ko03440
Metabolic pathways	114 (53.77%)	616 (63.7%)	0.999718	0.999924	ko01100
Microbial metabolism in diverse environments	21 (9.91%)	169 (17.48%)	0.999815	0.999924	ko01120
Two-component system	2 (0.94%)	48 (4.96%)	0.999924	0.999924	ko02020
